# Supplementary material for: MicroRNA-224 down-regulates Glycine N-methyltransferase gene expression in Hepatocellular Carcinoma
Source: PubMed Central journal article supplement (PMC6095880; doi:10.1038/s41598-018-30682-5), 2018-08-16
Supplement: 41598_2018_30682_MOESM1_ESM.pdf [file 41598_2018_30682_MOESM1_ESM.pdf]

**MicroRNA-224 down-regulates Glycine N-methyltransferase gene expression in Hepatocellular Carcinoma**

Jung-Hsien Hung<sup>1,2</sup>, Chung-Hsien Li<sup>2</sup>, Ching-Hua Yeh<sup>2</sup>, Pin-Chen Huang<sup>2</sup>, Cheng-Chieh Fang<sup>2</sup>, Yen-Fu Chen<sup>2</sup>, Kuo-Jui Lee<sup>2</sup>, Chih-Hung Chou<sup>3</sup>, Hsin-Yun Cheng<sup>2</sup>, Hsien-Da Huang<sup>3,4</sup>, Marcelo Chen<sup>5,6,7</sup>, Ting-Fen Tsai<sup>8</sup>, Anya Maan-Yuh Lin<sup>1,9,10</sup>, Chia-Hung Yen<sup>2,11</sup>, Ann-Ping Tsou<sup>12</sup>, Yu-Chang Tyan<sup>2</sup> and Yi-Ming Arthur Chen<sup>2,13</sup>

**Supporting Information Table of Contents**

**Supporting Information Materials and Methods**

**Supporting Information Tables S1-4**

**Supporting Information Figure S1-6**

**Supporting Information Original Picture for Western Blot**

## Supporting Information

**Reverse-transcription and real-time polymerase chain reaction (RT-qPCR).** Total RNA was extracted using Trizol reagent (Invitrogen, Carlsbad, CA). RNA was reverse-transcribed using Tetro cDNA Synthesis Kit (Bioline, Tauton, MA) according to the manufacturer's instructions. KAPA SYBR FAST cursor Kits (Kapa Biosystems, Woburn, MA) were used for real-time PCR applications. PCR conditions were as follows: 5 min at 95°C followed by 40 cycles of 95°C for 10 sec, 60°C for 30 sec and 72°C for 30 sec. Primer sequences are shown in Table S4. For the detection of hsa-miR-224, 20 ng of total RNA was reversely transcribed into complementary DNA using TaqMan MicroRNA Assay hsa-miR-224 reverse transcription primer and TaqMan miRNA reverse-transcriptase kit using the instructions provided by the manufacturer (Invitrogen, Carlsbad, CA). The miRNA expression was normalized to the level of RNU48 RNA.

### **Construction of pGNMT-MT plasmid and 3' UTR reporter assay**

To construct plasmid pGNMT-MT containing the cytomegalovirus (CMV) promoter, a FLAG fragment and a miR-224 binding site silent mutation (MT) of full length GNMT coding sequences for FLAG-tagged GNMT, we used pFLAG-CMV-5 (Sigma) as a vector and the pGNMT (wild type of GNMT cDNA) plasmid<sup>1</sup> as the PCR template for generating the insert. Mutations of the GNMT cDNA were made using PCR with the QuikChange II (Stratagene) site-directed mutagenesis kit. The presence of correct mutations was confirmed by DNA sequencing. The wild type (WT) and silent mutant (MT) cDNA fragment were subcloned downstream of renilla luciferase gene in a vector psi-CHECK2 (Promega). Detailed procedure of the constructions of the plasmids is illustrated in Figure S6 and primer sequences are shown in Table S4. HEK293T cells were transiently co-transfected with plasmid DNA from psiCHECK2-GNMT-WT (psi-WT) or a binding site mutant plasmid psiCHECK2-GNMT-MT (psi-MT) along with miRIDIAN mimic-negative control (NC) or hsa-miR-224 mimic (224-mimic) (Dharmacon) using TurboFect (Fermentas) and Trans IT-TKO (Mirus). After 48 hours, luciferase activity was measured using the Dual-Luciferase Reporter Assay System Kit (Promega) and Infinite 200 (TECAN) following the manufacturer's instructions. In the assay, renilla luciferase activities were normalized to firefly luciferase activities.

### **Cell proliferation**

Cell proliferation was determined using the alamarBlue assay (Invitrogen, Carlsbad, CA). Ten thousands cells were seeded in triplicates on 24 well plates for 1, 3, 5, 7 and 9 days. 100 µl of alamarBlue solution (final concentration of 10% in medium) and cells were further incubated for 4 h at 37°C for a specified time period. After incubation, 100 µl of the alamarBlue solution from each well of the assay plates was transferred to a new well in 96-well plate, then fluorescence was measured at 530/590 nm. Proliferation was compared to that of the 1<sup>st</sup> day group.

### **Hepatitis B Virus X Protein (HBx) Transgenic Mice Liver tissues.**

HBx transgenic mice (C57B/6 background) were generated as described<sup>2</sup>. Mice Liver tissues were obtained from professor Tsai's group in the National Yang-Ming University. The liver tissues were collected separately from 1.5-, 6-, 12, 16-month-old mice in two different groups: HBx transgenic type and wild-type male (n=3~6). Total RNA was isolated from mouse liver using Trizol Reagent (Invitrogen, Carlsbad, CA).

### **Masson's Trichrome stain**

The collagen deposition in liver tissue was evaluated by Masson's trichrome staining (HT15-1KT, SIGMA-AIDRICH). Brief description: deparaffinize tissue sections and hydrate to deionized water. Stain in working Weigert's Iron Hematoxylin solution for 1 minute. Wash in running tap water for 5 minutes. Rinse in deionized water. Stain in Biebrich Scarlet Acid Fuchsin solution for 10 seconds. Rinse in deionized water. Place slides in working Phosphotungstic-Phosphomolybdic Acid solution for 5 minutes. Stain in Aniline Blue solution for 5 minutes. Rinse in deionized water. Place slides in 1% Acetic Acid solution for 2 minutes. Rinse in deionized water and dehydrate through alcohol 1 min, clear in xylene for 1 minute.

### **References**

- 1 Chen, S. Y. *et al.* Glycine N-methyltransferase tumor susceptibility gene in the benzo(a)pyrene-detoxification pathway. *Cancer research* **64**, 3617-3623, doi:10.1158/0008-5472.CAN-03-3726 (2004).
- 2 Wu, B. K. *et al.* Blocking of G1/S transition and cell death in the regenerating liver of Hepatitis B virus X protein transgenic mice. *Biochemical and biophysical research communications* **340**, 916-928, doi:10.1016/j.bbrc.2005.12.089 (2006).

**Table S1 The putative microRNAs response elements in the CDS and 3' UTR GNMT mRNA from miRWalk and miRTar software**

| MicroRNA        | Seed Length | Start | Position | End | Region |
|-----------------|-------------|-------|----------|-----|--------|
| hsa-let-7f-2*   | 7           | 109   | 2        | 103 | CDS    |
| hsa-miR-1       | 8           | 857   | 2        | 850 | CDS    |
| hsa-miR-1178    | 8           | 473   | 2        | 466 | CDS    |
| hsa-miR-1225-5p | 7           | 748   | 1        | 742 | CDS    |
| hsa-miR-1226    | 7           | 234   | 2        | 228 | CDS    |
| hsa-miR-1227    | 7           | 209   | 2        | 203 | CDS    |
| hsa-miR-1233    | 7           | 60    | 2        | 54  | CDS    |
| hsa-miR-1236    | 8           | 241   | 1        | 234 | CDS    |
| hsa-miR-1247    | 7           | 81    | 2        | 75  | CDS    |
| hsa-miR-1250    | 7           | 476   | 2        | 470 | CDS    |
| hsa-miR-1265    | 11          | 557   | 2        | 547 | CDS    |
| hsa-miR-127-5p  | 7           | 248   | 1        | 242 | CDS    |
| hsa-miR-1281    | 7           | 87    | 2        | 81  | CDS    |
| hsa-miR-1289    | 9           | 223   | 1        | 215 | CDS    |
| hsa-miR-129*    | 7           | 245   | 1        | 239 | CDS    |
| hsa-miR-129*    | 7           | 59    | 2        | 53  | CDS    |
| hsa-miR-1307    | 8           | 139   | 1        | 132 | CDS    |
| hsa-miR-1321    | 7           | 39    | 1        | 33  | CDS    |
| hsa-miR-1324    | 8           | 757   | 1        | 750 | CDS    |
| hsa-miR-135b*   | 7           | 854   | 1        | 848 | CDS    |
| hsa-miR-145     | 7           | 361   | 2        | 355 | CDS    |
| hsa-miR-1469    | 7           | 138   | 1        | 132 | CDS    |
| hsa-miR-1539    | 7           | 7     | 1        | 1   | CDS    |
| hsa-miR-1825    | 8           | 212   | 2        | 205 | CDS    |
| hsa-miR-1915    | 8           | 42    | 1        | 35  | CDS    |
| hsa-miR-198     | 8           | 372   | 2        | 365 | CDS    |
| hsa-miR-199a-5p | 7           | 213   | 1        | 207 | CDS    |
| hsa-miR-199b-5p | 7           | 213   | 1        | 207 | CDS    |
| hsa-miR-206     | 8           | 857   | 2        | 850 | CDS    |
| hsa-miR-22      | 8           | 104   | 2        | 97  | CDS    |
| hsa-miR-22*     | 7           | 588   | 2        | 582 | CDS    |
| hsa-miR-224     | 9           | 609   | 1        | 601 | CDS    |
| hsa-miR-299-3p  | 7           | 659   | 2        | 653 | CDS    |
| hsa-miR-302a    | 7           | 295   | 1        | 289 | CDS    |
| hsa-miR-302b    | 7           | 295   | 1        | 289 | CDS    |
| hsa-miR-302c    | 7           | 295   | 1        | 289 | CDS    |
| hsa-miR-302d    | 7           | 295   | 1        | 289 | CDS    |
| hsa-miR-302e    | 7           | 295   | 1        | 289 | CDS    |
| hsa-miR-335*    | 7           | 491   | 1        | 485 | CDS    |
| hsa-miR-338-3p  | 7           | 232   | 2        | 226 | CDS    |
| hsa-miR-33a*    | 8           | 496   | 1        | 489 | CDS    |
| hsa-miR-33b*    | 7           | 211   | 1        | 205 | CDS    |
| hsa-miR-342-5p  | 7           | 577   | 2        | 571 | CDS    |
| hsa-miR-345     | 7           | 392   | 1        | 386 | CDS    |
| hsa-miR-361-3p  | 8           | 43    | 2        | 36  | CDS    |
| hsa-miR-411     | 7           | 596   | 1        | 590 | CDS    |
| hsa-miR-424     | 7           | 165   | 1        | 159 | CDS    |
| hsa-miR-432     | 7           | 781   | 2        | 775 | CDS    |
| hsa-miR-452     | 8           | 433   | 1        | 426 | CDS    |

|                 |    |      |   |      |      |
|-----------------|----|------|---|------|------|
| hsa-miR-486-5p  | 11 | 566  | 2 | 556  | CDS  |
| hsa-miR-497     | 7  | 165  | 1 | 159  | CDS  |
| hsa-miR-505*    | 7  | 62   | 1 | 56   | CDS  |
| hsa-miR-519a    | 8  | 294  | 2 | 287  | CDS  |
| hsa-miR-519b-3p | 8  | 294  | 2 | 287  | CDS  |
| hsa-miR-519c-3p | 8  | 294  | 2 | 287  | CDS  |
| hsa-miR-520a-5p | 7  | 371  | 2 | 365  | CDS  |
| hsa-miR-524-3p  | 7  | 330  | 1 | 324  | CDS  |
| hsa-miR-525-3p  | 7  | 330  | 1 | 324  | CDS  |
| hsa-miR-525-5p  | 7  | 371  | 2 | 365  | CDS  |
| hsa-miR-526b    | 8  | 884  | 1 | 877  | CDS  |
| hsa-miR-532-5p  | 9  | 149  | 1 | 141  | CDS  |
| hsa-miR-548g    | 7  | 434  | 2 | 428  | CDS  |
| hsa-miR-562     | 7  | 866  | 2 | 860  | CDS  |
| hsa-miR-604     | 8  | 127  | 2 | 120  | CDS  |
| hsa-miR-604     | 7  | 787  | 1 | 781  | CDS  |
| hsa-miR-613     | 7  | 857  | 2 | 851  | CDS  |
| hsa-miR-622     | 7  | 893  | 2 | 887  | CDS  |
| hsa-miR-622     | 7  | 452  | 2 | 446  | CDS  |
| hsa-miR-628-5p  | 7  | 393  | 2 | 387  | CDS  |
| hsa-miR-634     | 7  | 233  | 2 | 227  | CDS  |
| hsa-miR-637     | 7  | 388  | 1 | 382  | CDS  |
| hsa-miR-637     | 7  | 580  | 2 | 574  | CDS  |
| hsa-miR-644     | 7  | 751  | 1 | 745  | CDS  |
| hsa-miR-646     | 7  | 156  | 1 | 150  | CDS  |
| hsa-miR-646     | 7  | 776  | 2 | 770  | CDS  |
| hsa-miR-663     | 7  | 328  | 1 | 322  | CDS  |
| hsa-miR-665     | 7  | 716  | 2 | 710  | CDS  |
| hsa-miR-668     | 7  | 274  | 1 | 268  | CDS  |
| hsa-miR-668     | 7  | 606  | 2 | 600  | CDS  |
| hsa-miR-671-3p  | 7  | 312  | 2 | 306  | CDS  |
| hsa-miR-675     | 7  | 132  | 2 | 126  | CDS  |
| hsa-miR-758     | 7  | 625  | 2 | 619  | CDS  |
| hsa-miR-767-5p  | 8  | 508  | 2 | 501  | CDS  |
| hsa-miR-877*    | 7  | 886  | 1 | 880  | CDS  |
| hsa-miR-877*    | 7  | 241  | 2 | 235  | CDS  |
| hsa-miR-886-3p  | 7  | 123  | 2 | 117  | CDS  |
| hsa-miR-888     | 7  | 724  | 1 | 718  | CDS  |
| hsa-miR-892b    | 7  | 271  | 1 | 265  | CDS  |
| hsa-miR-922     | 7  | 166  | 1 | 160  | CDS  |
| hsa-miR-93*     | 7  | 394  | 2 | 389  | CDS  |
| hsa-miR-940     | 7  | 423  | 1 | 417  | CDS  |
| hsa-miR-943     | 7  | 391  | 1 | 385  | CDS  |
| hsa-miR-1285    | 7  | 927  | 2 | 921  | 3UTR |
| hsa-miR-1286    | 7  | 1068 | 1 | 1062 | 3UTR |
| hsa-miR-1291    | 8  | 981  | 1 | 974  | 3UTR |
| hsa-miR-129-5p  | 7  | 1072 | 2 | 1066 | 3UTR |
| hsa-miR-1324    | 9  | 948  | 1 | 940  | 3UTR |
| hsa-miR-141*    | 10 | 954  | 1 | 945  | 3UTR |
| hsa-miR-185*    | 7  | 969  | 2 | 963  | 3UTR |
| hsa-miR-188-5p  | 7  | 1017 | 1 | 1011 | 3UTR |
| hsa-miR-20b*    | 7  | 1001 | 2 | 995  | 3UTR |
| hsa-miR-328     | 8  | 982  | 1 | 975  | 3UTR |
| hsa-miR-33b*    | 8  | 933  | 1 | 926  | 3UTR |

|                 |    |      |   |      |      |
|-----------------|----|------|---|------|------|
| hsa-miR-340*    | 7  | 1034 | 1 | 1028 | 3UTR |
| hsa-miR-450b-5p | 7  | 1071 | 1 | 1065 | 3UTR |
| hsa-miR-485-5p  | 11 | 987  | 1 | 977  | 3UTR |
| hsa-miR-485-5p  | 7  | 921  | 1 | 915  | 3UTR |
| hsa-miR-491-5p  | 7  | 1172 | 2 | 1162 | 3UTR |
| hsa-miR-507     | 7  | 1071 | 1 | 1065 | 3UTR |
| hsa-miR-512-5p  | 7  | 897  | 1 | 891  | 3UTR |
| hsa-miR-515-3p  | 7  | 932  | 2 | 926  | 3UTR |
| hsa-miR-517*    | 7  | 991  | 2 | 985  | 3UTR |
| hsa-miR-518d-5p | 9  | 991  | 1 | 983  | 3UTR |
| hsa-miR-518e*   | 9  | 991  | 1 | 983  | 3UTR |
| hsa-miR-518f*   | 9  | 991  | 1 | 983  | 3UTR |
| hsa-miR-519a*   | 9  | 991  | 1 | 983  | 3UTR |
| hsa-miR-519b-5p | 9  | 991  | 1 | 983  | 3UTR |
| hsa-miR-519c-5p | 9  | 991  | 1 | 983  | 3UTR |
| hsa-miR-519e    | 7  | 932  | 2 | 926  | 3UTR |
| hsa-miR-520c-5p | 9  | 991  | 1 | 983  | 3UTR |
| hsa-miR-522*    | 9  | 991  | 1 | 983  | 3UTR |
| hsa-miR-523*    | 9  | 991  | 1 | 983  | 3UTR |
| hsa-miR-526a    | 9  | 991  | 1 | 983  | 3UTR |
| hsa-miR-550     | 8  | 932  | 1 | 925  | 3UTR |
| hsa-miR-612     | 8  | 927  | 2 | 920  | 3UTR |
| hsa-miR-625*    | 7  | 1052 | 1 | 1046 | 3UTR |
| hsa-miR-661     | 8  | 930  | 1 | 923  | 3UTR |
| hsa-miR-767-3p  | 7  | 995  | 1 | 989  | 3UTR |
| hsa-miR-873     | 9  | 1067 | 1 | 1059 | 3UTR |
| hsa-miR-920     | 8  | 911  | 2 | 904  | 3UTR |

**Table S2 The growth of subcutaneous tumors in NOD/SCID mice**

| <b>Stably transfected cells</b> | <b>Mice examined</b> | <b>Mice with tumor</b> | <b>Tumor sizes (mm<sup>3</sup>, mean ± SD)</b> | <b>Tumor weights (mg, mean ± SD)</b> |
|---------------------------------|----------------------|------------------------|------------------------------------------------|--------------------------------------|
| H7-miR-224                      | 6                    | 6 (100%)               | 1848.0 ± 268.7                                 | 2746.8 ± 657.2                       |
| H7-GFP                          | 6                    | 6 (100%)               | 1388.9 ± 294.1                                 | 1783.8 ± 503.6                       |
| H7-GNMT/miR-224                 | 6                    | 6 (100%)               | 1006.2 ± 276.2                                 | 1077.6 ± 317.1                       |
| H7-GNMT                         | 6                    | 6 (100%)               | 847.7 ± 168.4                                  | 870.2 ± 234.0                        |

**Table S3. Main clinical and histopathologic features of 78 patients with hepatocellular carcinoma.**

| Clinicopathological feature           | Variable                | No. of cases (%) |
|---------------------------------------|-------------------------|------------------|
| Mean age $\pm$ SD, years (range)      | 60.5 $\pm$ 14.6 (13-85) | 78 (100)         |
| Gender                                | male                    | 39 (50)          |
|                                       | female                  | 39 (50)          |
| Viral infection                       | HBV                     | 40 (51)          |
|                                       | HCV                     | 20 (26)          |
|                                       | NBNC                    | 18 (23)          |
| Cirrhosis                             | No                      | 42 (54)          |
|                                       | Yes                     | 36 (46)          |
| AFP                                   | $\leq$ 100 ng/ml        | 40 (51)          |
|                                       | >100 ng/ml              | 38 (49)          |
| Tumor size                            | $\leq$ 3 cm             | 15 (19)          |
|                                       | >3cm                    | 63 (81)          |
| Tumor grade*                          | I                       | 3 (4)            |
|                                       | II                      | 18 (23)          |
|                                       | III–IV                  | 57 (73)          |
| TNM stage<br>(AJCC and UICC, 7th ed.) | I                       | 37 (47)          |
|                                       | II                      | 17 (22)          |
|                                       | IIIA                    | 10 (13)          |
|                                       | IIIB                    | 10 (13)          |
|                                       | IIIC                    | 2 (2.5)          |
|                                       | IV                      | 2 (2.5)          |

Abbreviations: HBV, patients with hepatitis B virus surface antigen (HBs Ag); HCV, patients with antibody to HCV; NBNC, patients without HBs Ag and antibody to HCV; AFP, serum  $\alpha$ -fetoprotein level.

\* The tumor grade was divided into three groups: well (grade I), moderately (grade II), and poorly differentiated HCC (grades III and IV).



**Table S4. Primer sequences and Taqman assays**

| Name                 | Items        | Sequence/ Assay ID                    |
|----------------------|--------------|---------------------------------------|
| pCMV5a-F             | Clone-Primer | 5`-AGCTCGTTTAGTGAACCGTCAG-3`          |
| pCMV5a-R             | Clone-Primer | 5`-TCGACTGGTACCGATATCAGATC-3`         |
| GNMTmt-F             | Clone-Primer | 5`-CTACTATAAGTCAGATCTCACCAAGGACGTC-3` |
| GNMTmt-R             | Clone-Primer | 5`-CGTCCTTGGTGAGATCTGACTTATAGTAGAT-3` |
| Xho1-CDS-F           | Clone-Primer | 5`-CCGCTCGAGGCGGCGCGCG-3`             |
| Not1-CDS-R           | Clone-Primer | 5`-ATAAGAATGCGGCCGCCAGGACGCTGTGC-3`   |
| GNMT-F               | qPCR-Primer  | 5`-ACTGGATGACTCTGGACAA-3`             |
| GNMT-R               | qPCR-Primer  | 5`-ACTGAGGATGTGGTCGT-3`               |
| TBP-F <sup>a</sup>   | qPCR-Primer  | 5`-TGCACAGGAGCCAAGAGTG-3`             |
| TBP-R <sup>a</sup>   | qPCR-Primer  | 5`-CACATCACAGCTCCCCACC-3`             |
| API-5-F <sup>b</sup> | qPCR-Primer  | 5`-TAGTGGGTTTGGAGAAGTTC-3`            |
| API-5-R <sup>b</sup> | qPCR-Primer  | 5`-TCACTTGATAGGCATCTTTATG-3`          |
| SMAD4-F <sup>c</sup> | qPCR-Primer  | 5`-AGGATCAGTAGGTGGAATAG-3`            |
| SMAD4-R <sup>c</sup> | qPCR-Primer  | 5`-TCTAAAGTTGTGGGTCTGC-3`             |
| hsa-miR-224          | TaqMan Assay | 477986_mir                            |
| RNU48                | TaqMan Assay | 001006                                |
| mmu-miR-224          | TaqMan Assay | mmu482610_mir                         |
| snoRNA202            | TaqMan Assay | 001232                                |
| hGNMT-F              | qPCR-Primer  | 5`-GCAGCCTTCGGAGGTAAGTG-3`            |
| hGNMT-R              | qPCR-Primer  | 5`-CTAGCAGTCCCTGGGCAGAG-3`            |
| mGNMT-F              | qPCR-Primer  | 5`-GCCTACGTTCCCTGCTACTT-3`            |

|                 |             |                              |
|-----------------|-------------|------------------------------|
| mGNMT-R         | qPCR-Primer | 5`-GCATTTGGGTGCAGATGTGG-3`   |
| Collagen I-F    | qPCR-Primer | 5`-AAGAGGCGAGAGAGGTT-3`      |
| Collagen I-R    | qPCR-Primer | 5`-CCTTTGGGACCAGCATC-3`      |
| $\alpha$ -SMA-F | qPCR-Primer | 5`-ATTCAGGCTGTGCTGTC-3`      |
| $\alpha$ -SMA-R | qPCR-Primer | 5`-TCTCACGCTCGGCAGTA-3`      |
| TGF- $\beta$    | qPCR-Primer | 5`-CCAAAGACATCTCACACAGTA-3`  |
| TGF- $\beta$    | qPCR-Primer | 5`-GCCACTCAGGCGTATCA-3`      |
| $\beta$ 2m-F    | qPCR-Primer | 5`-ATCCTGGCTCACACTGAATTCA-3` |
| $\beta$ 2m -R   | qPCR-Primer | 5`-TGCTTAACTCTGCAGGCGTATG-3` |

a. Gur-Dedeoglu B, Konu O, Bozkurt B, Ergul G, Seckin S, Yulug IG. Identification of endogenous reference genes for qRT-PCR analysis in normal matched breast tumor tissues. *Oncology research* 2009;17:353-65.

b. Wang Y, Lee AT, Ma JZ, Wang J, Ren J, Yang Y, Tantoso E, Li KB, Ooi LL, Tan P, Lee CG. Profiling microRNA expression in hepatocellular carcinoma reveals microRNA-224 up-regulation and apoptosis inhibitor-5 as a microRNA-224-specific target. *The Journal of biological chemistry* 2008;283:13205-15.

c. Wang Y, Ren J, Gao Y, Ma JZ, Toh HC, Chow P, Chung AY, Ooi LL, Lee CG. MicroRNA-224 targets SMAD family member 4 to promote cell proliferation and negatively influence patient survival. *PloS one* 2013;8:e68744.

**Figure S1 The putative miR-224, miR-93\* and miR-491-5p-response element in human GNMT**

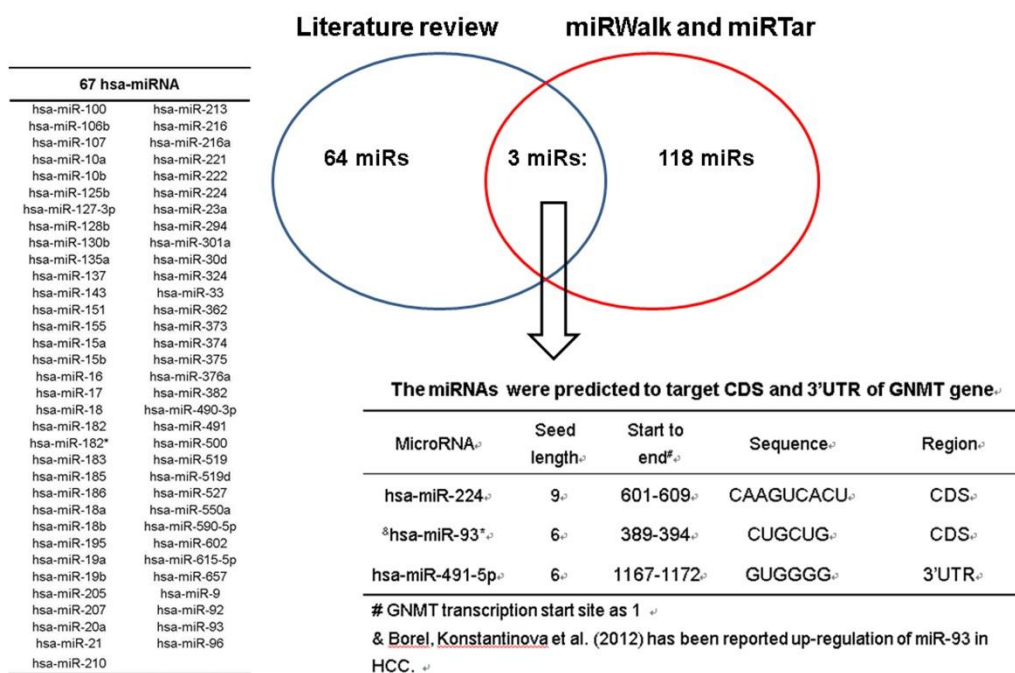

**Figure S2**

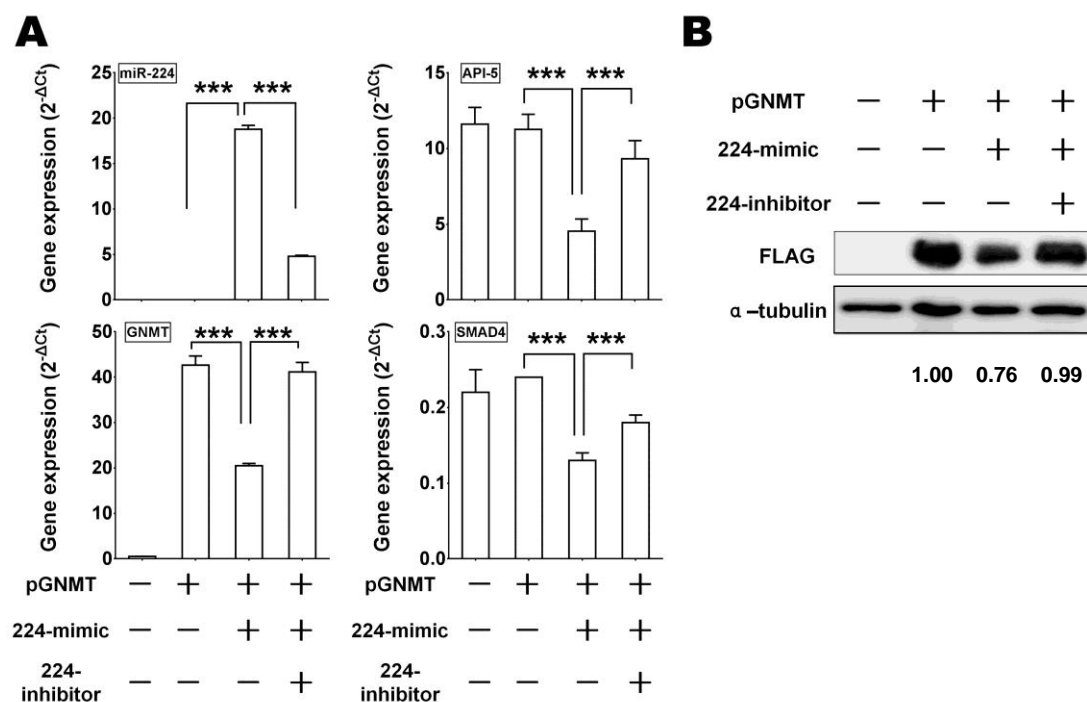

**Figure S2.** The exogenous GNMT was suppressed by miR-224. (A) Relative miR-224 and GNMT transcript measured with qPCR in HEK293T cells transiently transfected with a control group (eGFP plasmid, 50 nM NC and NC inhibitor) or pGNMT plasmid, 224-mimic, 224-mimic/224-inhibitor. These averages are for the three replicates shown on each array. The gene expression level of each sample was normalized to the level of TBP (TATA-binding protein) RNA. API-5 and SMAD4 served as positive controls to ensure the validity of 224-mimic and 224-inhibitor activity. (B) GNMT protein expression was measured by western blotting in HEK293T cells transfected with NC or pGNMT plasmid, 224-mimic and 224-mimic/224-inhibitor. α-tubulin was used as internal control.

**Figure S3**

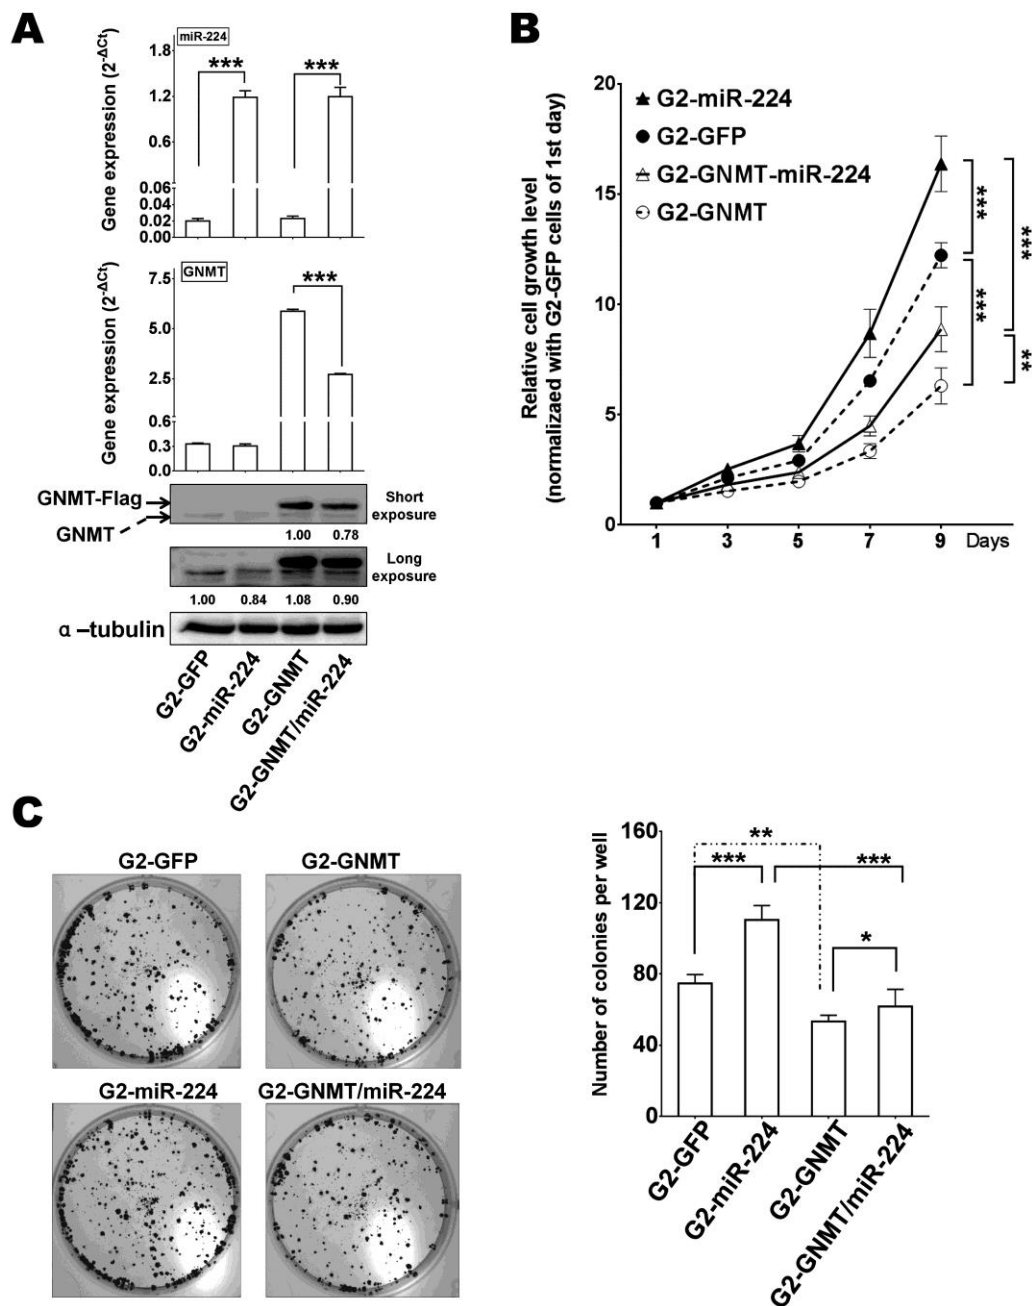

**Figure S3.** Effect of miR-224/GNMT on HepG2 cell line growth in vitro. (A) The GNMT and miR-224 transcript levels in HepG2 infected with lentivirus expressing miR-224 and GNMT were measured by qPCR (upper panel). \*\*\**P*

< 0.001 compared with cells infected with lentivirus expressing eGFP and scramble miR-224. GNMT protein expressions examine by western blotting (bottom panel). (B) The proliferation activity of HepG2 as measured by the alamarBlue assay at the time indicated. The absorbance of cells at day 1 was used as quantitative baseline. The expression level of each sample was normalized to the average of that of the control group. \*\* $P < 0.01$ , \*\*\* $P < 0.001$ . (C) The colony formation was quantified by staining crystal violet. 1500 cells were seeded into each well of 6 well plates and incubated for 21 days.

**Figure S4**

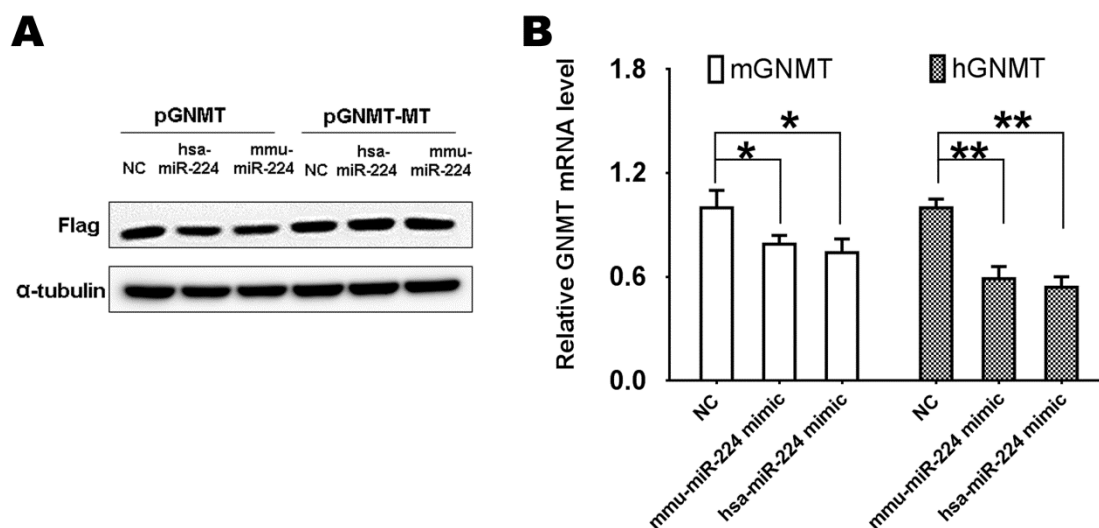

**Figure S4.** GNMT was regulated by miR-224 in human and mouse cell lines. (A) GNMT protein expression was measured by western blotting in HEK293T cells transiently cotransfected with pGNMT/mmu-miR-224 mimic, pGNMT/hsa-miR-224 mimic, pGNMT-MT/mmu-miR-224 mimic and pGNMT-MT/hsa-miR-224 mimic.  $\alpha$ -tubulin was used as internal control. (B) Relative mouse and human GNMT transcript measured with qPCR in Hepa 1-6 cells transiently cotransfected with pGNMT/control group (50 nM NC), pGNMT/mmu-miR-224 mimic and pGNMT/hsa-miR-224 mimic. Data were normalized to expression levels of the mouse  $\beta$ 2m and huma TBP. The relative expression fold of GNMT mRNA normalized to control group, respectively.

**Figure S5**

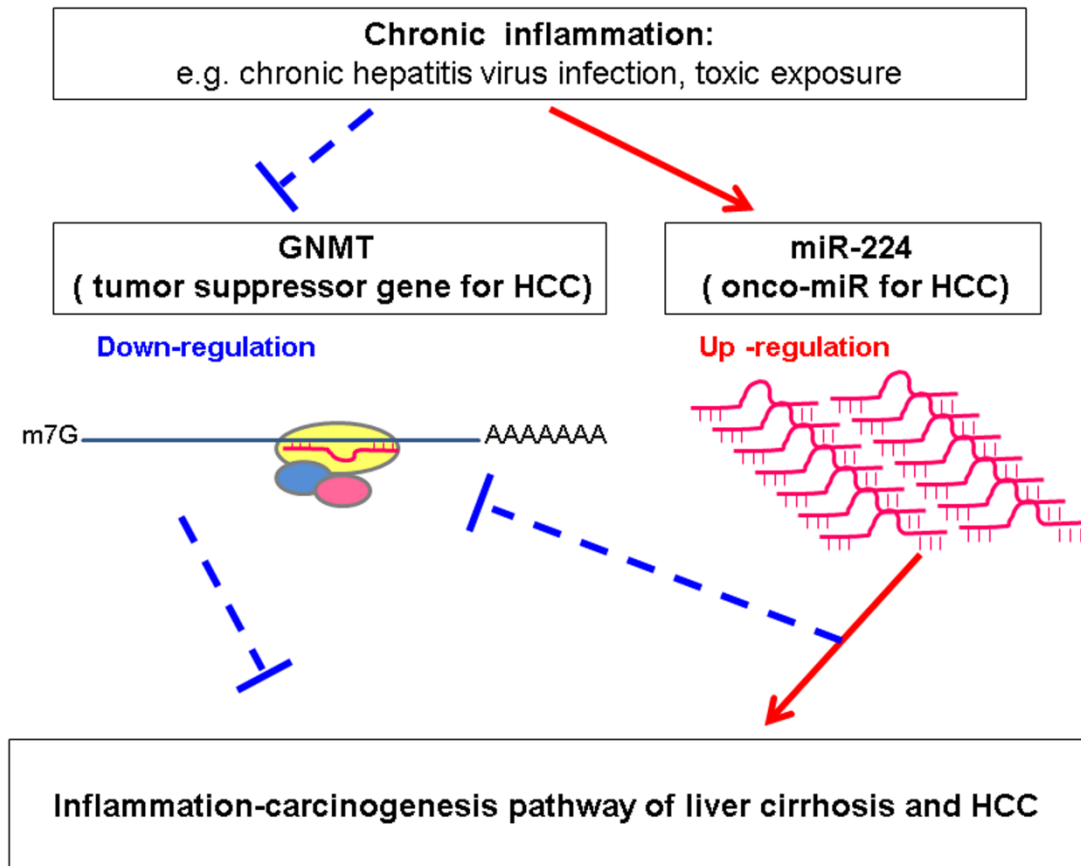

**Figure S5**

A scheme of the mechanism of GNMT down-regulation of chronic hepatitis virus infection and toxic exposure induced-inflammation response and miR-224 over-expression in liver cirrhosis and HCC.



**Figure S6**

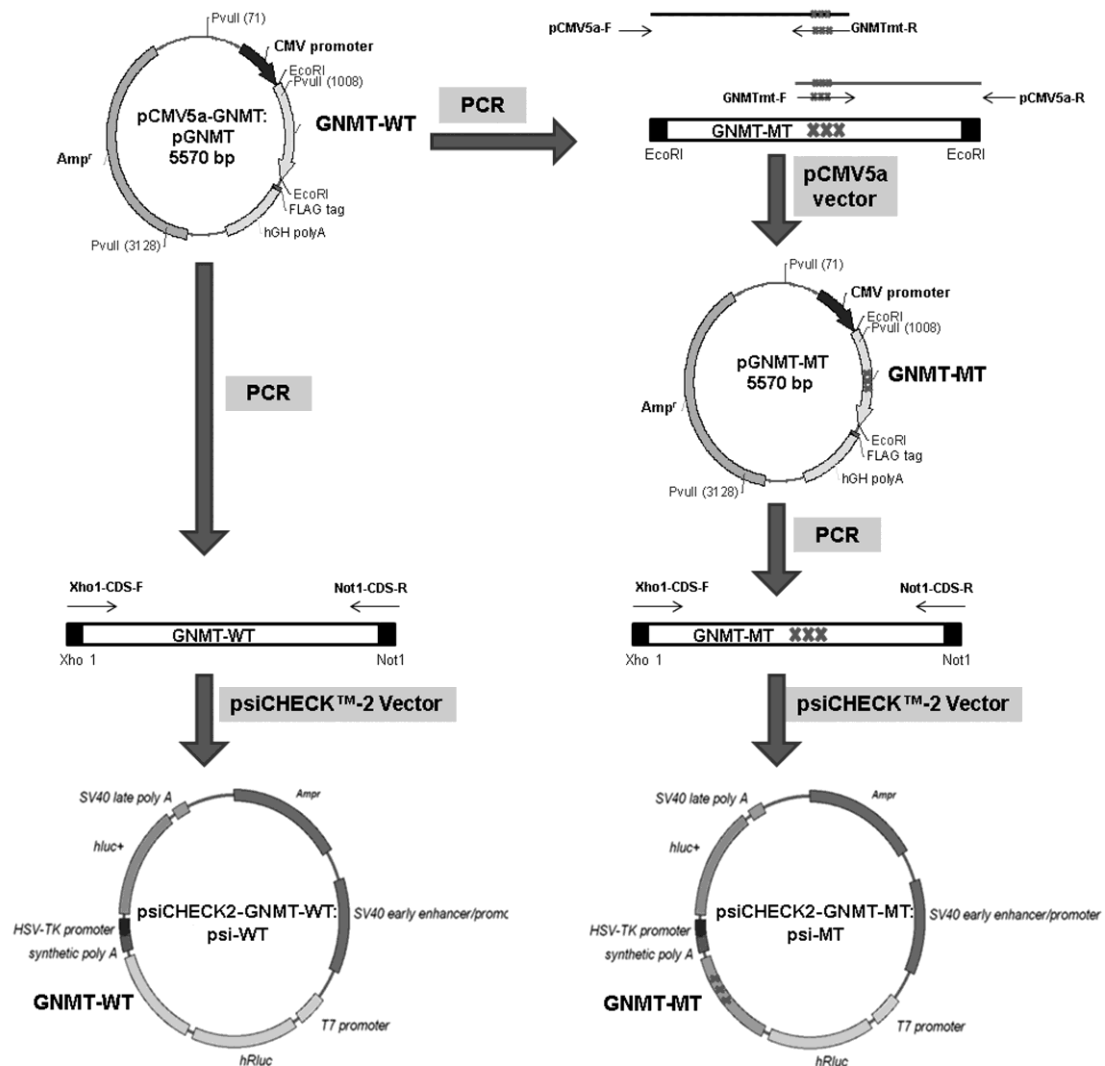

**Figure S6.** Construction of GNMT-MT, psiCHECK2-GNMT-WT (psi-WT) and psiCHECK2-GNMT-MT (psi-MT) plasmids. Molecular constructs were made in plasmid-pFLAG-CMV-5 and pSI-CHECK-2 by cloning a single restriction enzyme site (*EcoRI*) and the silent mutant (MT) GNMT cDNA (GNMT-MT, 0.9 kb) sequence and cloning behind the *Renilla* luciferase in the *XhoI* and *NotI* restrictions sites, GNMT-WT and GNMT-MT sequences from pGNMT and pGNMT-MT plasmids and named as psiCHECK2-GNMT-WT (psi-WT) and psiCHECK2-GNMT-MT (psi-MT).

Original picture for western blot

Pictures of main body

Original pictures

Fig. 2D

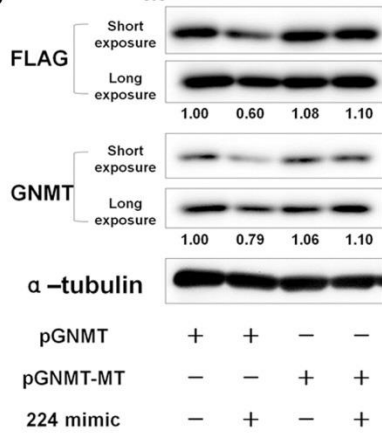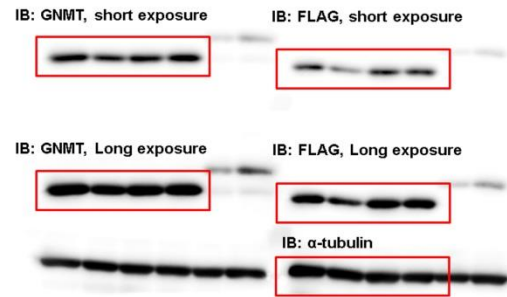

Fig. 3B

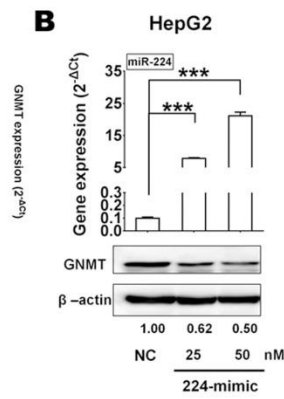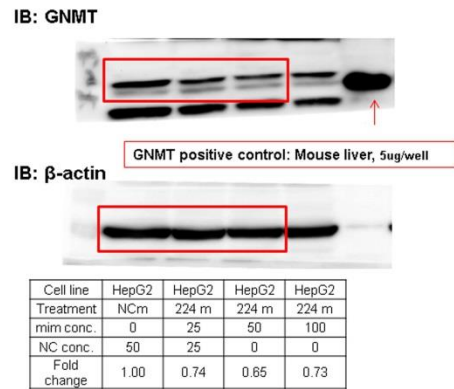

Fig. 3C

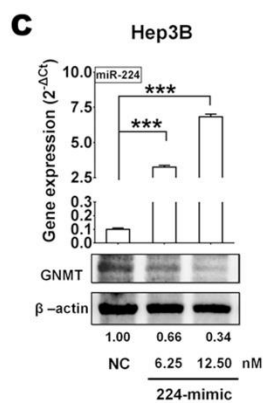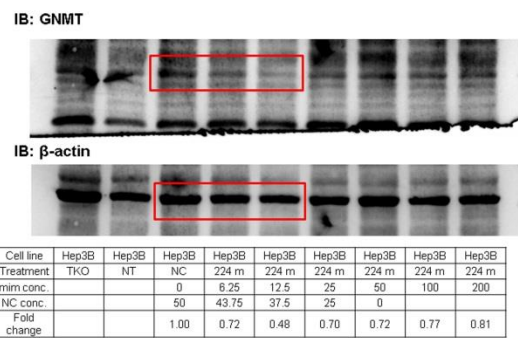

## Pictures of main body

## Original pictures

**Fig. 3D**

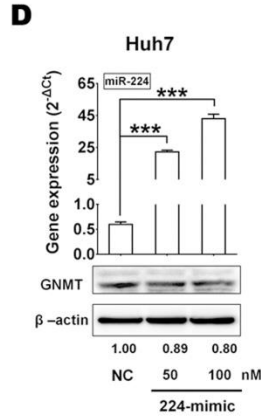

**Fig. 3E**

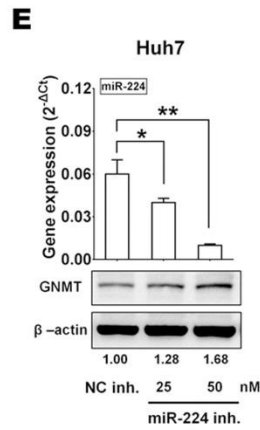

**Fig. 4A and Fig. S3A**

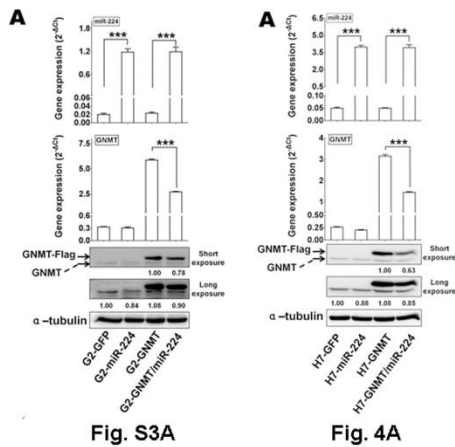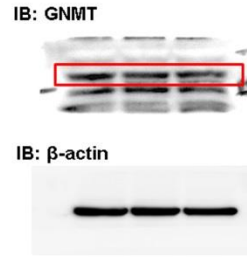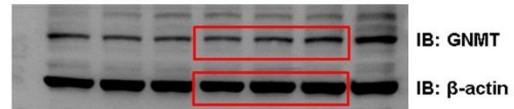

| Cell line            | Huh7 | Huh7 | Huh7 | Huh7 | Huh7     | Huh7     | Huh7     |
|----------------------|------|------|------|------|----------|----------|----------|
| Treatment            | NT   | Mock | NCi  | NCi  | 224 inh. | 224 inh. | 224 inh. |
| Inhibitor conc. (nM) | 0    | 0    | 0    | 0    | 25       | 50       | 200      |
| NC conc. (nM)        | 0    | 0    | 200  | 50   | 25       | 0        | 0        |
| Fold change          | 1.13 | 0.98 | 0.97 | 1.00 | 1.32     | 1.72     | 1.95     |

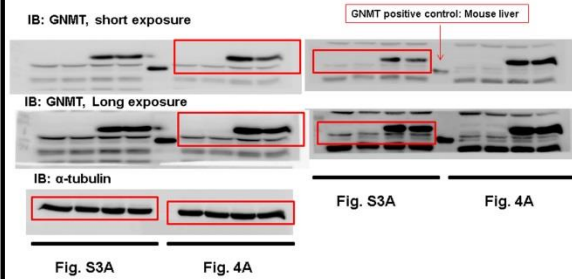

**Pictures of main body**

**Original pictures**

**Fig. S2B**

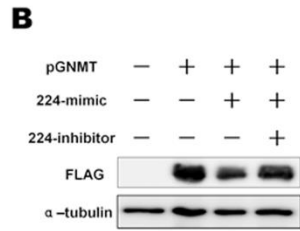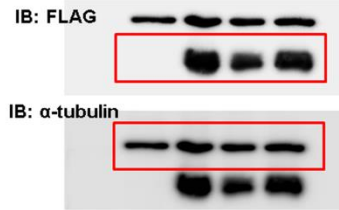

**Fig. S4A**

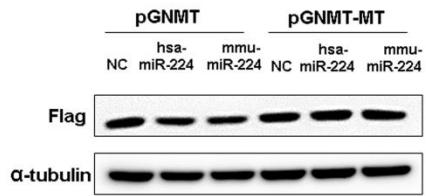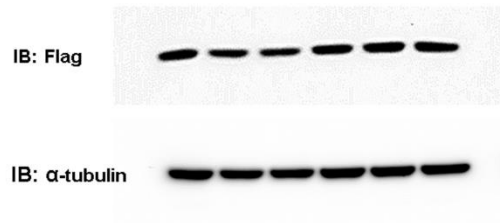

**Original picture for western blot.** Western blot analysis of figures in text corresponded with original data.
